# Supplementary material for: One-step synthesis of red/green dual-emissive carbon dots for ratiometric sensitive ONOO− probing and cell imaging
Source: Royal Society of Chemistry journal article supplement (doi:10.1039/c8nr04596h), 2018-01-01
Supplement: c8nr04596h1.pdf [file c8nr04596h1.pdf]

Supplementary Information

**One-step synthesis of red/green dual-emission carbon dots  
for ratiometric sensitive ONOO<sup>-</sup> probing and cell imaging**

Juanjuan Liu<sup>1,2</sup>, Yanyan Dong<sup>1,2</sup>, Yunxia Ma<sup>1,2</sup>, Yangxia Han<sup>1,2</sup>, Sudai Ma<sup>1,2</sup>, Hongli  
Chen<sup>1,2</sup>, and Xingguo Chen\*<sup>1,2,3</sup>

<sup>1</sup> State Key Laboratory of Applied Organic Chemistry, Lanzhou University, Lanzhou  
730000, China

<sup>2</sup> Department of Chemistry, Lanzhou University, Lanzhou 730000, China

<sup>3</sup> Key Laboratory of Nonferrous Metal Chemistry and Resources Utilization of Gansu  
Province, Lanzhou University, Lanzhou 730000, China

\* Corresponding author

E-mail address: chenxg@lzu.edu.cn

Tel: 86-931-8912763

Fax: 86-931-8912582

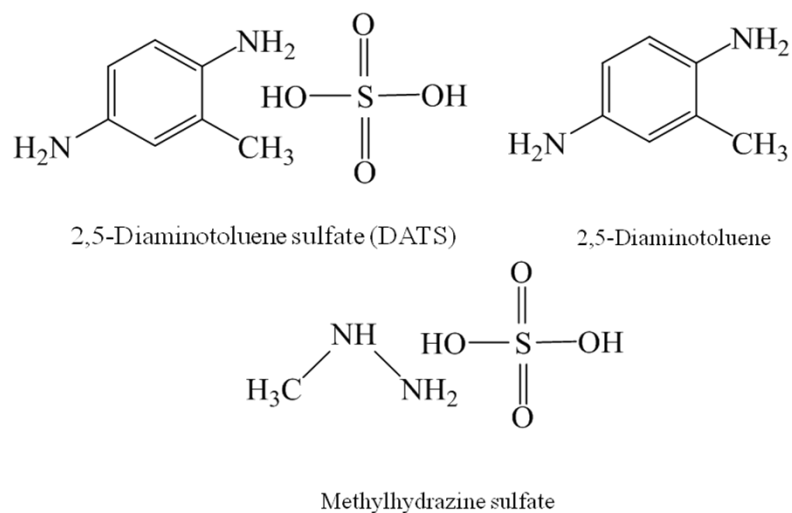

**Scheme S1.** Structural formulas of 2,5-diaminotoluene sulfate, 2,5-diaminotoluene and methylhydrazine sulfate.

**Table S1.** Comparison of the properties of the RGDE CDs with other CDs.

| Synthetic raw material             | Single/dual emission | Excitation wavelength (nm) | Emission wavelength (nm) | QY (%)                      | Reference |
|------------------------------------|----------------------|----------------------------|--------------------------|-----------------------------|-----------|
| citric acid, urea, sodium fluoride | single               | 530                        | 600                      | 1.20                        | 1         |
| citric acid, neutral red           | single               | 530                        | 632                      | 12.1                        | 2         |
| p-phenylenediamine                 | single               | 470                        | 620                      | 15.0                        | 3         |
| ascorbic acid, ethylene glycol     | dual                 | 365                        | 435/538                  | not mentioned               | 4         |
| m-phenylenediamine, sulfuric acid  | dual                 | 300                        | 360/520                  | 43.0<br>(460 nm excitation) | 5         |
| citric acid, urea                  | dual                 | 380                        | 455/520                  | 14.0<br>(420 nm excitation) | 6, 7      |
| 2,5-diaminotoluene sulfate         | dual                 | 380                        | 525/603                  | 9.00<br>(380 nm excitation) | this work |

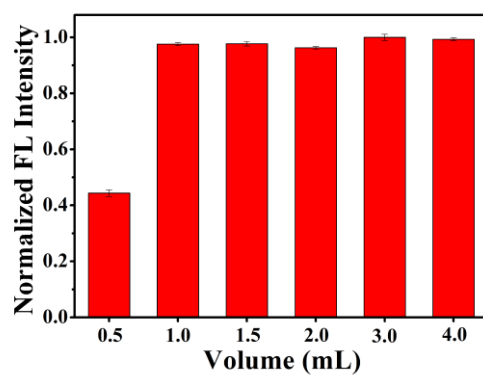

**Fig. S1.** Effect of ethanol volume on the fluorescence intensity (603 nm) of the RGDE CDs.

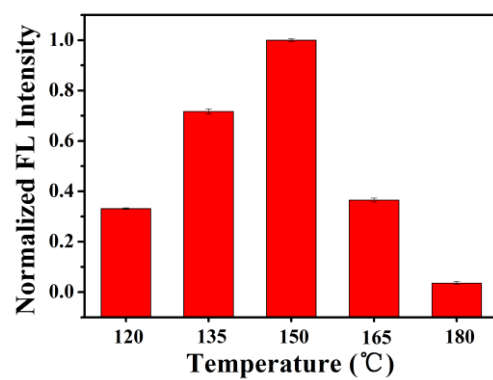

**Fig. S2.** Effect of reaction temperature on the fluorescence intensity (603 nm) of the RGDE CDs.

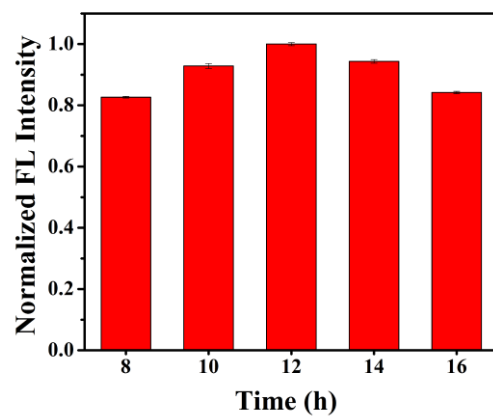

**Fig. S3.** Effect of reaction time on the fluorescence intensity (603 nm) of the RGDE CDs.

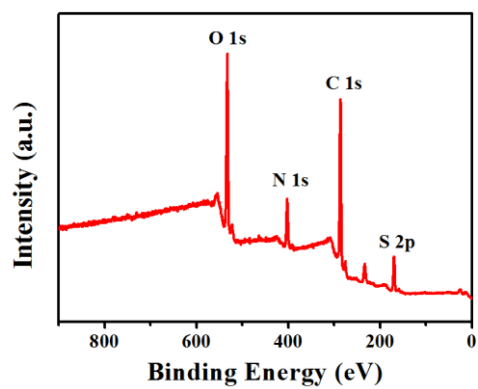

**Fig. S4.** XPS full-scan spectrum of the RGDE CDs.

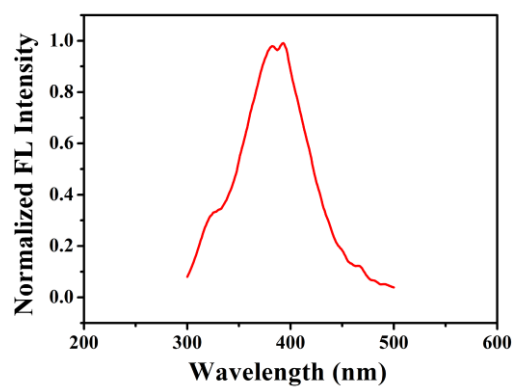

**Fig. S5.** Fluorescence excitation spectrum of the RGDE CDs.



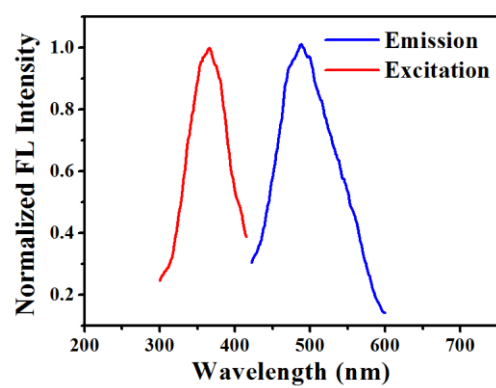

**Fig. S6.** Fluorescence excitation and emission spectra of the CDs prepared through using 2,5-diaminotoluene as carbon source.

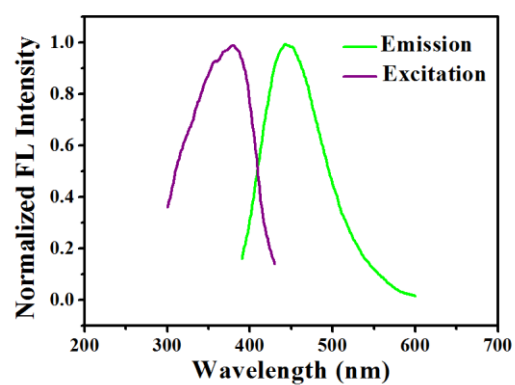

**Fig. S7.** Fluorescence excitation and emission spectra of the CDs prepared through using methylhydrazine sulfate as carbon source.

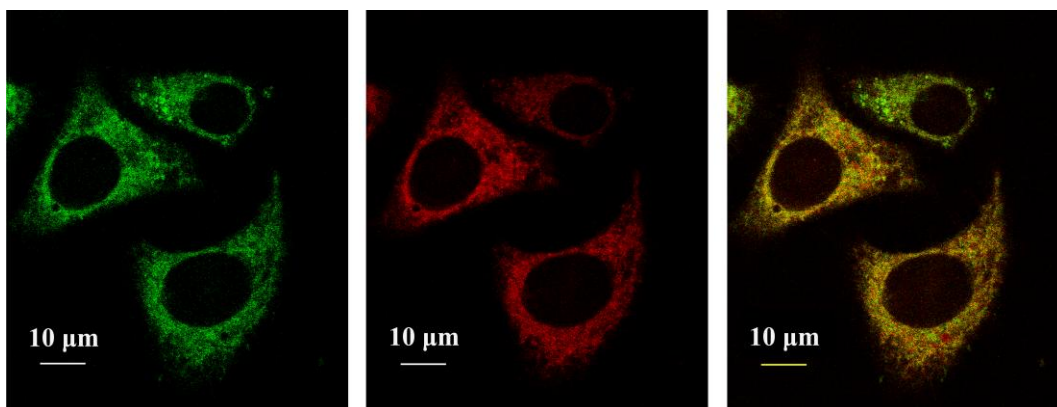

**Fig. S8.** Confocal microscopy fluorescence images of HeLa cells treated with the RGDE CDs (30  $\mu\text{g}/\text{mL}$ ) in green channel, red channel and merged image of green and red channel. Scale bar is 10  $\mu\text{m}$ .

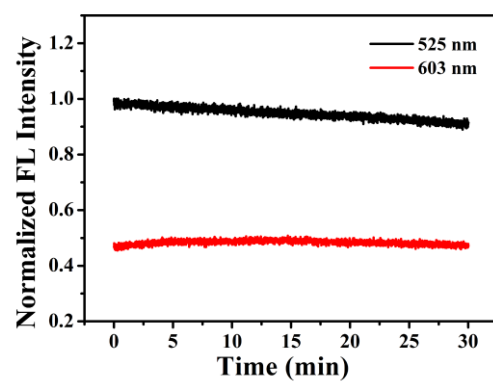

**Fig. S9.** Effect of light illumination time on the fluorescence intensity of the RGDE CDs.

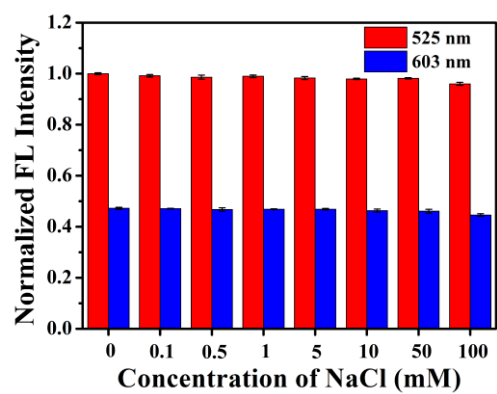

**Fig. S10.** Effect of concentration of NaCl solution on the fluorescence intensity of the RGDE CDs.

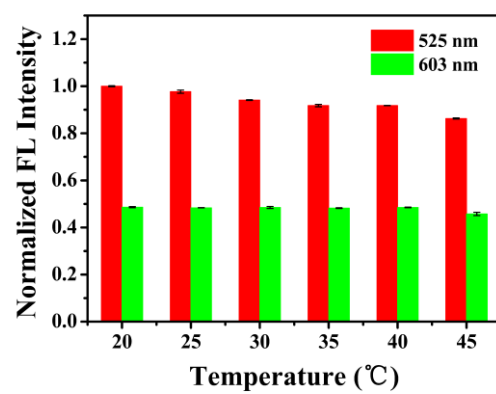

**Fig. S11.** Effect of environmental temperature on the fluorescence intensity of the RGDE CDs.

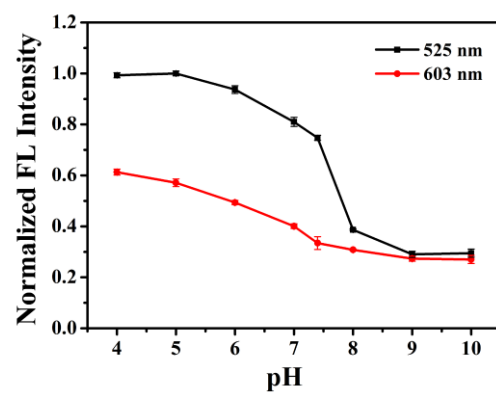

**Fig. S12.** Effect of pH of buffer solution on the fluorescence intensity of the RGDE CDs.

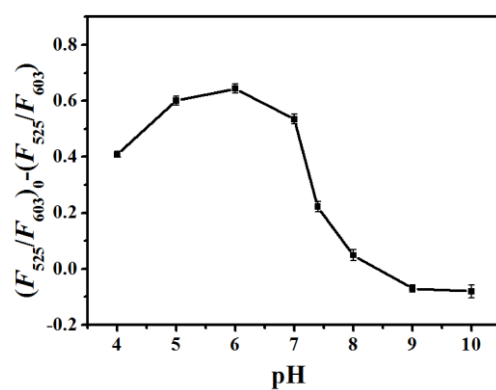

**Fig. S13.** Effect of pH of buffer solution on  $(F_{525}/F_{603})_0$  and  $(F_{525}/F_{603})$ .  $(F_{525}/F_{603})_0$  and  $(F_{525}/F_{603})$  were the fluorescence intensity ratios of the RGDE CDs solution in the absence and presence of  $22 \mu\text{M ONOO}^-$ , respectively.



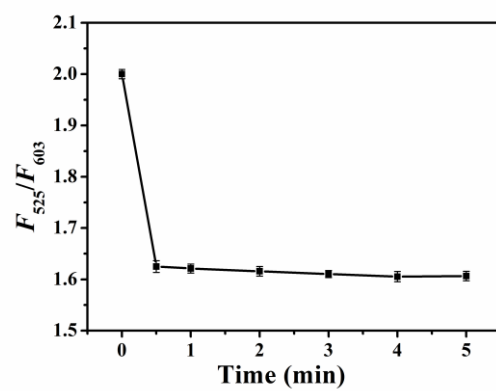

**Fig. S14.** Time-dependent fluorescence intensity of the RGDE CDs with the addition of 22  $\mu\text{M}$   $\text{ONOO}^-$  at room temperature.

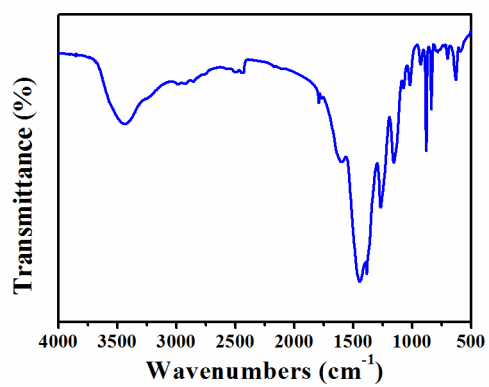

**Fig. S15.** FT-IR spectrum of the RGDE CDs in the presence of  $\text{ONOO}^-$ .

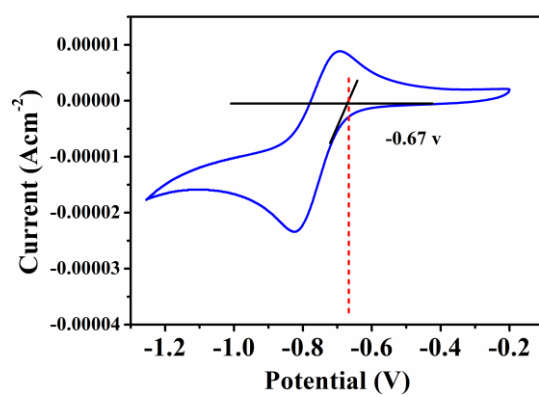

**Fig. S16.** Cyclic voltammograms of the RGDE CDs in the solution state (solvent: freshly dried dimethylformamide).

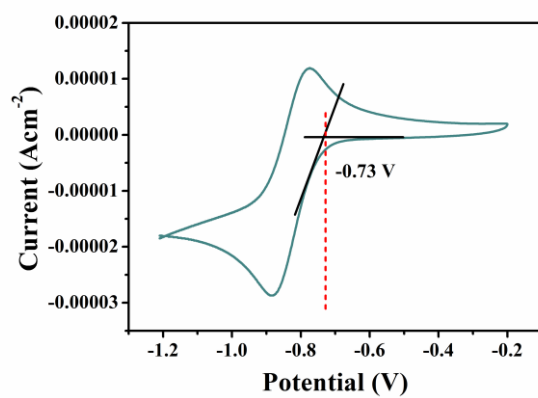

**Fig. S17.** Cyclic voltammograms of  $\text{ONOO}^-$  in the solution state (solvent: freshly dried dimethylformamide).

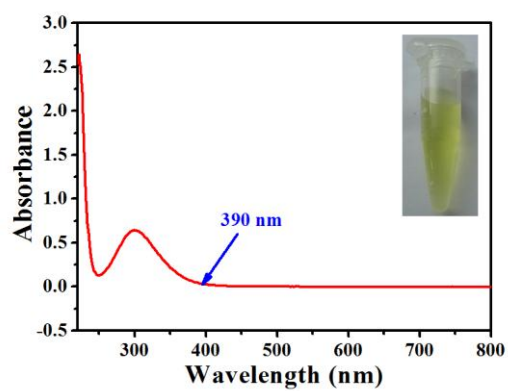

**Fig. S18.** UV-vis absorption spectrum of  $\text{ONOO}^-$ , inset was the photograph of  $\text{ONOO}^-$  solution under visible light.

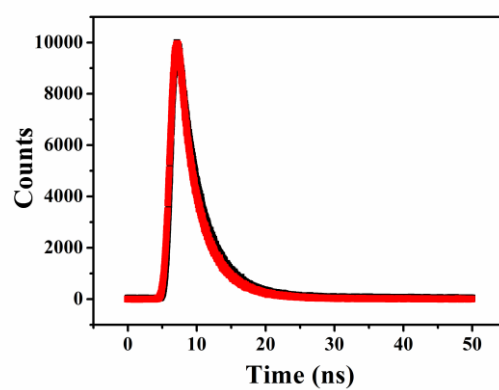

**Fig. S19.** Time-resolved decays of the RGDE CDs in the absence (black line) and presence (red line) of  $\text{ONOO}^-$ .

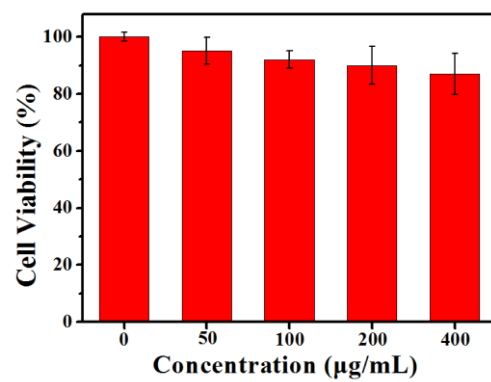

**Fig. S20.** Cell viability of HeLa cells with different concentrations of the RGDE CDs.

### Quantum yield (QY) measurements.

QY of the obtained RGDE CDs was determined by the method mentioned in our previous work.<sup>8</sup> The absolute photoluminescence quantum yield can be represented simple in the equation below:

$$QY = \frac{\int L_{\text{emission}}}{\int E_{\text{solvent}} - \int E_{\text{sample}}} \quad (1)$$

where QY was the absolute quantum yield,  $L_{\text{emission}}$  was the fluorescence (FL) emission spectrum of the RGDE CDs sample, collected using the sphere;  $E_{\text{sample}}$  was the spectrum of the light used to excite the sample, collected using the sphere;  $E_{\text{solvent}}$  was the spectrum of the light used for excitation with only the solvent in the sphere, collected using the sphere. The solvent in this experiment was deionized water.



## References

1. W. Yang, H. Zhang, J. Lai, X. Peng, Y. Hu, W. Gu and L. Ye, *Carbon*, 2018, **128**, 78-85.
2. W. Gao, H. Song, X. Wang, X. Liu, X. Pang, Y. Zhou, B. Gao and X. Peng, *ACS Appl. Mater. Interfaces*, 2018, **10**, 1147-1154.
3. Y. Sun, X. Wang, C. Wang, D. Tong, Q. Wu, K. Jiang, Y. Jiang, C. Wang and M. Yang, *Microchim. Acta*, 2018, **185**, 83.
4. R. Mohan, J. Drbohlavova and J. Hubalek, *Chem. Phys. Lett.*, 2018, **692**, 196-201.
5. W. Zhou, J. Zhuang, W. Li, C. Hu, B. Lei and Y. Liu, *J. Mater. Chem. C*, 2017, **5**, 8014-8021.
6. S. Qu, X. Wang, Q. Lu, L. X. Liu and L. Wang, *Angew. Chem.*, 2012, **124**, 12381-12384.
7. S. Qu, H. Chen, X. Zheng, J. Cao and X. Liu, *Nanoscale*, 2013, **5**, 5514-5518.
8. J. Feng, Y. Chen, Y. Han, J. Liu, C. Ren and X. Chen, *Anal. Chim. Acta*, 2016, **926**, 107-117.
